# Supplementary material for: Xylan–Porphyrin Hydrogels as Light-Triggered Gram-Positive Antibacterial Agents
Source: MDPI journal article supplement (doi:10.3390/gels9020124), 2023-02-02
Supplement: s1 [file s1]

# Xylan-Porphyrin Hydrogels as Light-Triggered Gram-Positive Antibacterial Agents

Abdechakour Elkihel <sup>1</sup>, Charlotte Vernisse<sup>1</sup>, Tan-Sothéa Ouk<sup>1</sup>, Romain Lucas-Roper <sup>2</sup>, Vincent Chaleix<sup>1</sup> and Vincent Sol <sup>1,\*</sup>

<sup>1</sup> Univ. Limoges, LABCiS, UR 22722, 87000 Limoges, France

<sup>2</sup> Univ. Limoges, IRCER, UMR CNRS 7315, 87000 Limoges, France

\* Correspondence: vincent.sol@unilim

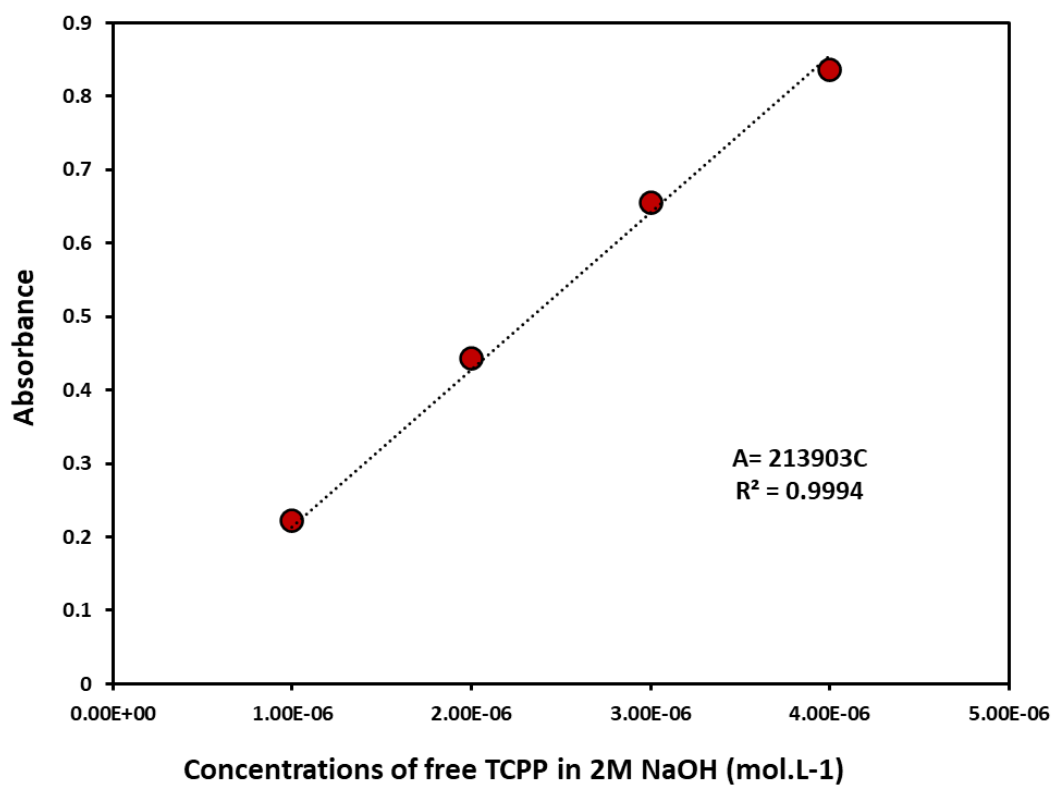

**Figure S1.** UV-Vis standard calibration curve obtained from different concentrations of free TCPP in 2 M sodium hydroxide ( $\lambda_{\max} = 410$  nm)

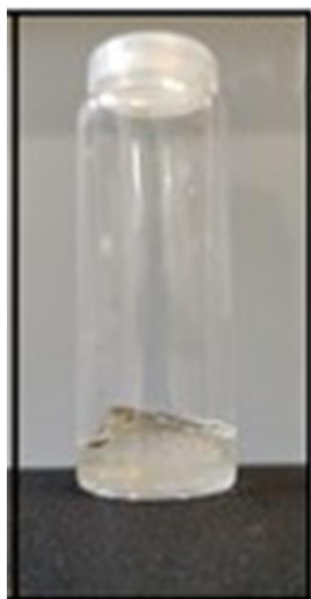

**Figure S2:** Photography of xylan-hydrogel free without TCPP and used as control (CT) and obtained in our previous work [21]

**Table S1.** Singlet oxygen quantum yield of TCPP and Xyl-TCPP-3 in DMF

| Compounds | Wavelength<br>$\lambda_{abs}$ (nm) | Singlet Oxygen<br>quantum yield<br>$\Phi_{\Delta}^1O_2^a$ |
|-----------|------------------------------------|-----------------------------------------------------------|
| TCPP      | 414                                | $0.81 \pm 0.01$                                           |
| Xyl-TCPP  | 414                                | $0.29 \pm 0.01$                                           |

<sup>a</sup> Mean of two independent experiments using tetraphenylporphyrin as standard ( $\Phi_{\Delta} = 0.64$  in DMF) and 9,10-dimethylanthracene as described in supporting information [23, 27]

**Determination of singlet oxygen production.** Singlet oxygen generating efficiencies of porphyrins were determined by photooxidation of 9,10-dimethylanthracene (DMA) based on steady-state photolysis. H<sub>2</sub>TPP in DMF was used as reference ( $\Phi_{\Delta}^{Std} = 0.64$ ). A mixture of 1.5 mL of a stock solution of DMA in DMF ( $10^{-4}$  M) and 1.5 mL of the tested photosensitizer in DMF ( $10^{-6}$  M) was transferred into a 1 cm quartz cuvette. The solution was then saturated with air and magnetically stirred. A 150 W halogen lamp was used to irradiate the sample at a distance of 30 cm (fluence rate  $0.3 \text{ mW/cm}^2$ ). A spectral window of 400-700 nm of the incident light was selected by eliminating UV and IR irradiation using an optical filter. Decrease of DMA concentration in DMF as a function of irradiation time was monitored at 401 nm. Absence of significant spectral change ruled out any photobleaching within the experimental period. Singlet oxygen quantum yield ( $\Phi_{\Delta}$ ) was calculated by using the equation below:

$$\Phi_{\Delta} = \Phi_{\Delta}^{Std} \frac{R \cdot I_{abs}^{Std}}{R^{Std} \cdot I_{abs}}$$

Where  $R$  and  $R^{Std}$  are the respective speeds of DMA disappearance in experimental sample and standard;  $I_{abs}$  and  $I_{abs}^{Std}$  are the light intensities absorbed between 400 and 700 nm by experimental sample and standard, respectively.
